# Supplementary material for: Injury Profiles in Korean Youth Soccer
Source: MDPI journal article supplement (doi:10.3390/ijerph17145125), 2020-07-16
Supplement: s1 [file s1]

Questionnaire S1

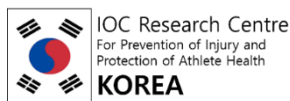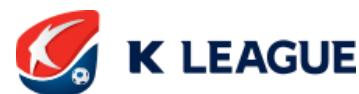

**Injury Report Form (Youth Soccer Players) by the Injury Surveillance System**

**Collaboration Between the IOC Research Centre KOREA and K LEAGUE**

**<Basic Information>**

1. Age: \_\_\_\_\_ years

2. Position

☐ Forward ☐ Midfielder ☐ Defender ☐ Goalkeeper

3. Athletic Career: \_\_\_\_\_ years

4. Dominant Leg

☐ Right ☐ Left ☐ Both

5. Height: \_\_\_\_\_ cm

6. Weight: \_\_\_\_\_ kg

7. Information About the Training Condition

| Contents                                 | Values                                                                                                              |
|------------------------------------------|---------------------------------------------------------------------------------------------------------------------|
| Duration of each training session        | _____ minute                                                                                                        |
| Number of training sessions held per day | _____ session                                                                                                       |
| Number of training days per week         | _____ day                                                                                                           |
| Number of training months per year       | _____ month                                                                                                         |
| Type of training ground                  | <input type="checkbox"/> Artificial turf <input type="checkbox"/> Natural turf <input type="checkbox"/> Hard ground |

8. Average Duration of Warm-up: \_\_\_\_\_ minutes

9. Education Experience for Prevention of Injuries

☐ Yes ☐ No

10. Number of Times Education for Injury Prevention was Received: \_\_\_\_\_ times

 **Go to the next page**

**<Injury Information>**

Please provide the information in the following table based on the criteria listed on injury information in the subsequent pages:

| <b>Contents</b>                                                           | <b>Injury 1</b> | <b>Injury 2</b> | <b>Injury 3</b> | <b>Injury 4</b> |
|---------------------------------------------------------------------------|-----------------|-----------------|-----------------|-----------------|
| 1. Date of injury                                                         |                 |                 |                 |                 |
| 2. Time that the injury occurred                                          |                 |                 |                 |                 |
| 3. Days taken to return to full team training                             |                 |                 |                 |                 |
| 4. Bodily location of the injury                                          |                 |                 |                 |                 |
| 5. Type of injury                                                         |                 |                 |                 |                 |
| 6. Cause of injury                                                        |                 |                 |                 |                 |
| 7. Recurrent injury                                                       |                 |                 |                 |                 |
| 8. Number of months elapsed from the index injury to the recurrent injury |                 |                 |                 |                 |
| 9. Experience of surgery caused by the injury                             |                 |                 |                 |                 |
| 10. Cost of treatment caused by the injury                                |                 |                 |                 |                 |

| <b>Contents</b>                                                           | <b>Injury 5</b> | <b>Injury 6</b> | <b>Injury 7</b> | <b>Injury 8</b> |
|---------------------------------------------------------------------------|-----------------|-----------------|-----------------|-----------------|
| 1. Date of injury                                                         |                 |                 |                 |                 |
| 2. Time that the injury occurred                                          |                 |                 |                 |                 |
| 3. Days taken to return to full team training                             |                 |                 |                 |                 |
| 4. Bodily location of the injury                                          |                 |                 |                 |                 |
| 5. Type of injury                                                         |                 |                 |                 |                 |
| 6. Cause of injury                                                        |                 |                 |                 |                 |
| 7. Recurrent injury                                                       |                 |                 |                 |                 |
| 8. Number of months elapsed from the index injury to the recurrent injury |                 |                 |                 |                 |
| 9. Experience of surgery caused by the injury                             |                 |                 |                 |                 |
| 10. Cost of treatment caused by the injury                                |                 |                 |                 |                 |

## <Definition of injury information>

### ※ Definition of injury

A soccer injury is considered as **any physical complaint** reported **by a player that occurred during a football match or a training session**, regardless of the “medical attention” or “time loss” from soccer activities.

A “medical attention” injury is defined as an injury that requires a player to receive medical attention.

A “time loss” injury is defined as an injury that results in a player being unable to fully engage in soccer training or a match play.

### 1. Date of injury

Please give **the date** when you were injured.

### 2. Time of injury occurrence

If you were injured during a training session, write “**training.**”

If you were injured during a match, write “**match.**”

\* A match between the same team is not considered a “match” but rather “training.”

### 3. Days elapsed before returning to full team training

Choose **the number of days** it took to recover from injury and participate in full team training.

(1) 0 day    (2) 1–3 days    (3) 4–7 days    (4) 8–28 days    (5) >28 days

### 4. Bodily location of injury

Choose the location on the body where you were injured.

| Head and Trunk                         | Upper Extremity                                       | Lower Extremity                                       |
|----------------------------------------|-------------------------------------------------------|-------------------------------------------------------|
| (1) Face (eye, nose, ear, tooth, etc.) | (11) Shoulder, clavicle (anterior, posterior)         | (21) Hip                                              |
| (2) Head                               | (12) Upper arm (anterior, posterior, medial, lateral) | (22) Groin                                            |
| (3) Neck                               | (13) Elbow (medial, lateral)                          | (23) Thigh (anterior, posterior, medial, lateral)     |
| (4) Upper back                         | (14) Forearm (anterior, posterior)                    | (24) Knee (medial, lateral)                           |
| (5) Rib                                | (15) Wrist (medial, lateral)                          | (25) Lower leg (anterior, posterior, medial, lateral) |
| (6) Low back                           | (16) Hand                                             | (26) Achilles tendon                                  |
| (7) Abdomen                            | (17) Finger                                           | (27) Ankle (anterior, medial, lateral)                |
| (8) Pelvis                             | (18) Thumb                                            | (28) Foot, toe                                        |
| (9) Genitalia                          |                                                       |                                                       |

## 5. Type of injury

Choose **the type of injury** you experienced.

|                                       |                                              |
|---------------------------------------|----------------------------------------------|
| (1) Contusion                         | (11) Contusion                               |
| (2) Fracture                          | (12) Tendinopathy                            |
| (3) Stress fracture (overuse)         | (13) Osteoarthritis, tenosynovitis, bursitis |
| (4) Other bone injury                 | (14) Fasciitis                               |
| (5) Subluxation, dislocation          | (15) Impingement syndrome                    |
| (6) Tendon rupture                    | (16) Abrasion                                |
| (7) Ligament rupture                  | (17) Dental injury                           |
| (8) Muscle strain                     | (18) Nerve or spinal cord injury             |
| (9) Sprain (ligament, joint capsule)  | (19) Muscle cramps                           |
| (10) Osteochondral or meniscal lesion | (20) Other                                   |

## 6. Cause of injury

Choose **the cause of injury** you experienced.

|                             |                               |                        |
|-----------------------------|-------------------------------|------------------------|
| (1) Overuse (gradual onset) | (11) Contact: another player  | (21) Ground condition  |
| (2) Overuse (sudden onset)  | (12) Contact: another person  | (22) Weather           |
| (3) Noncontact trauma       | (13) Contact: moving object   | (23) Equipment failure |
|                             | (14) Contact: stagnant object | (24) Other             |

## 7. Recurrent injury

If you were injured at the same body location with the same type of injury again, write “**Q**”.

If you were injured at the body location first, write “**X**”.

※ Recurrent injury is defined as an injury that occurred at **the same body location** with **the same type of injury** as **the index injury** suffered previously.

## 8. Months elapsed from the index injury to recurrent injury

Write **the number of months** that elapsed between the index injury and the recurrent injury.

## 9. Experience of surgery due to the injury

If you underwent surgery for the injury, write “**Q**”.

If you did not undergo surgery for the injury, write “**X**”.

## 10. Expenses for treatment due to the injury

Write **the expenses** that resulted from the injury (e.g., diagnosis, treatment, surgery, etc.)
